# Supplementary material for: Remyelination-Promoting DNA Aptamer Conjugate Myaptavin-3064 Binds to Adult Oligodendrocytes In Vitro
Source: MDPI journal article supplement (doi:10.3390/ph13110403), 2020-11-19

Remyelination-promoting DNA aptamer conjugate  
Myaptavin-3064 binds to adult oligodendrocytes

**Supplementary Figure 1:** Myaptavin-3064 does not bind neurons, astrocytes, or oligodendrocytes obtained from embryonic mixed cortical preparations. Live staining was performed on unfixed cells using (B, F, J) 100 nM Myaptavin-3064 or 3060-BS (D, H, L) for 1 h and O4 for 15 min (A, C). After washing, cells were fixed and permeabilized and stained for (E, G) neuron-specific beta-III tubulin and (I, K) glial fibrillary acidic protein, (GFAP).

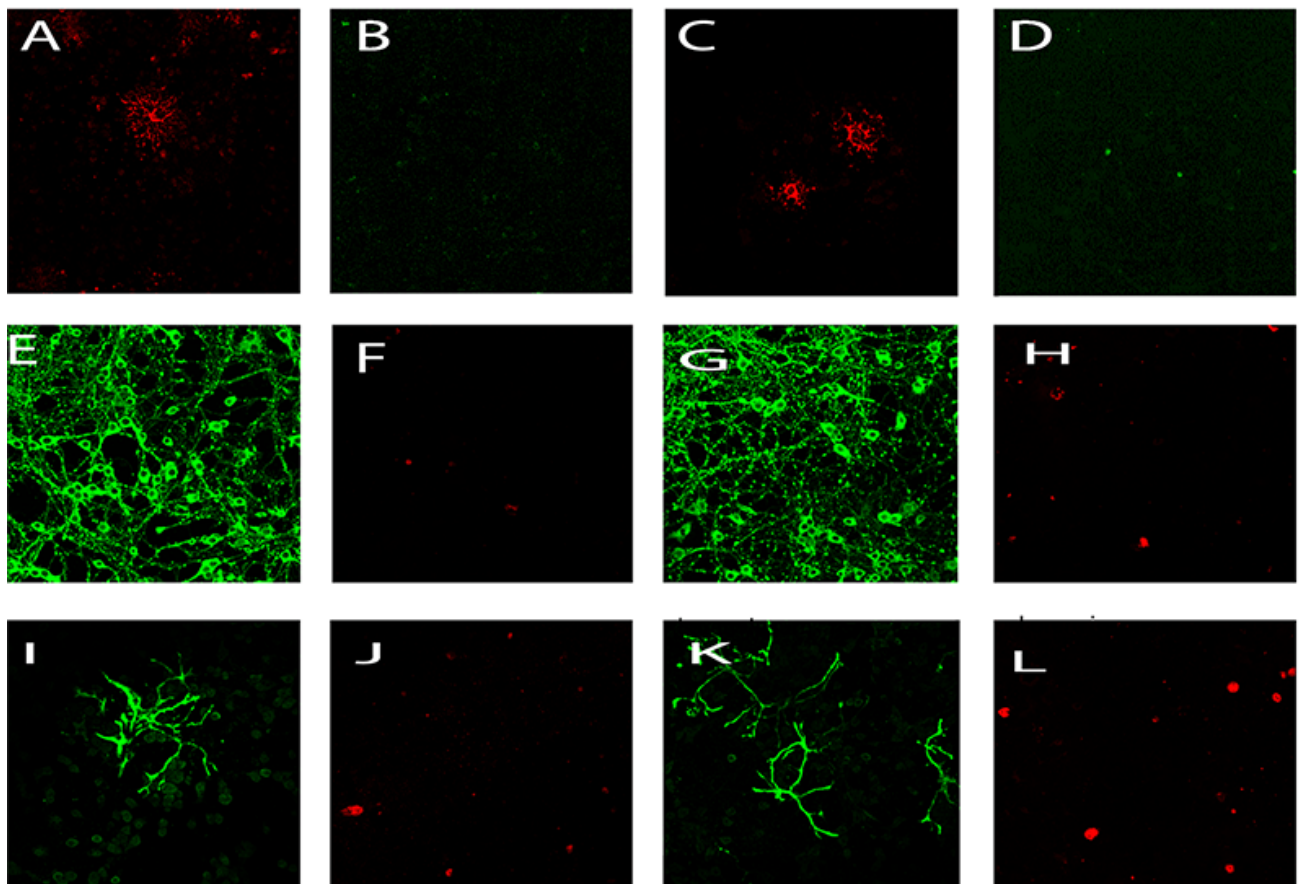

Supplement: s1 [file s1]
